# Supplementary material for: Functional Knowledge Transfer for High-accuracy Prediction of Under-studied Biological Processes
Source: PubMed Central journal article supplement (PMC3597527; doi:10.1371/journal.pcbi.1002957), 2013-03-14

### H. sapiens

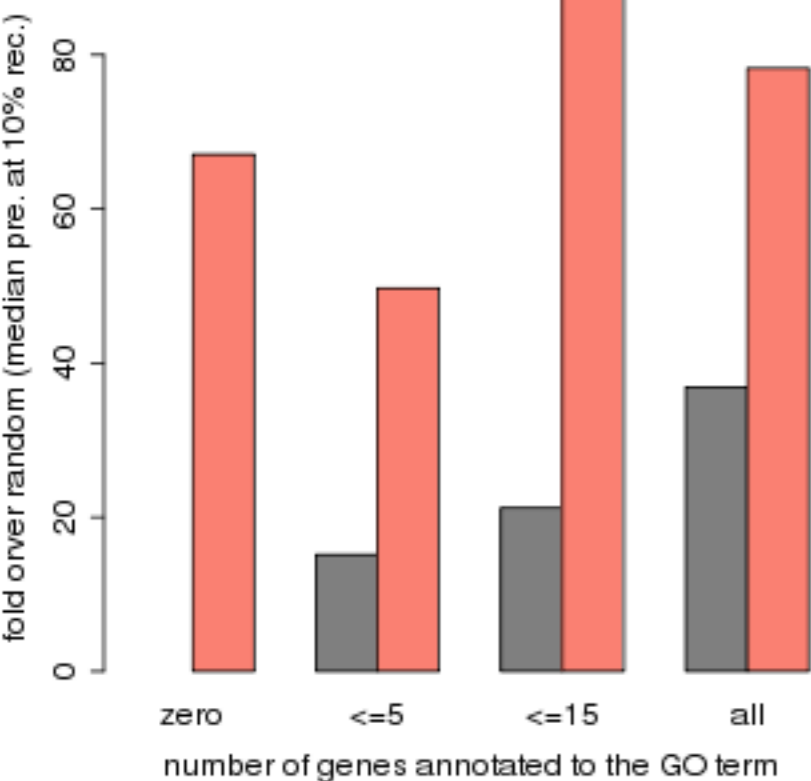

### M. musculus

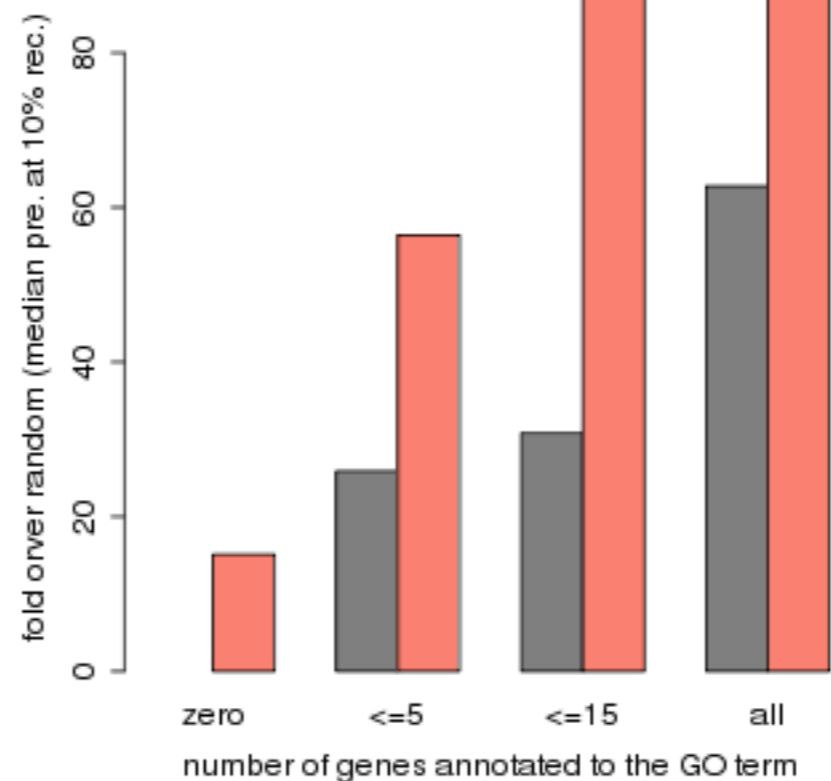

### D. rerio

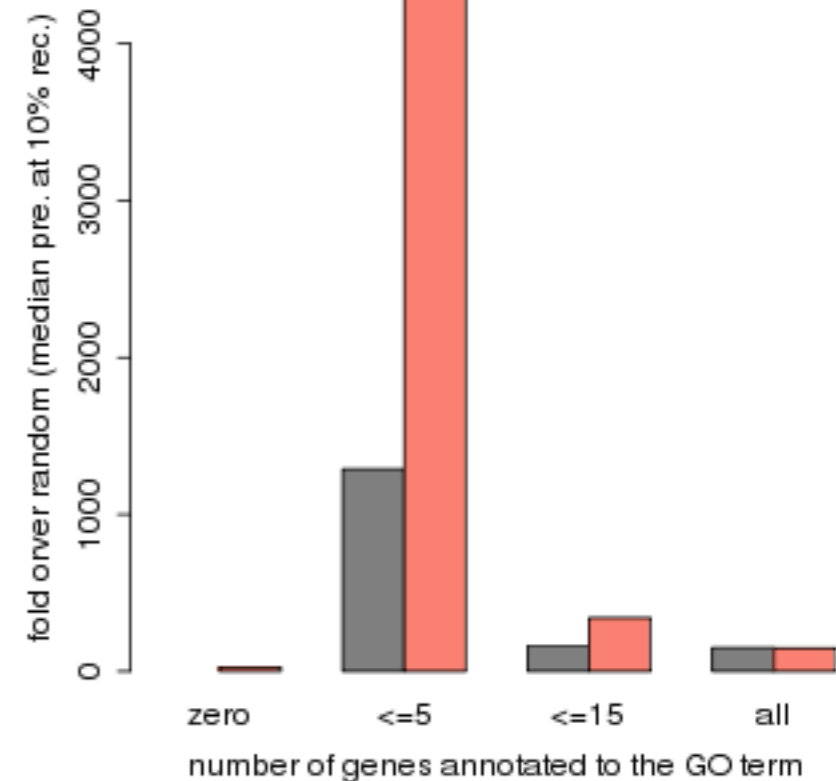

### R. norvegicus

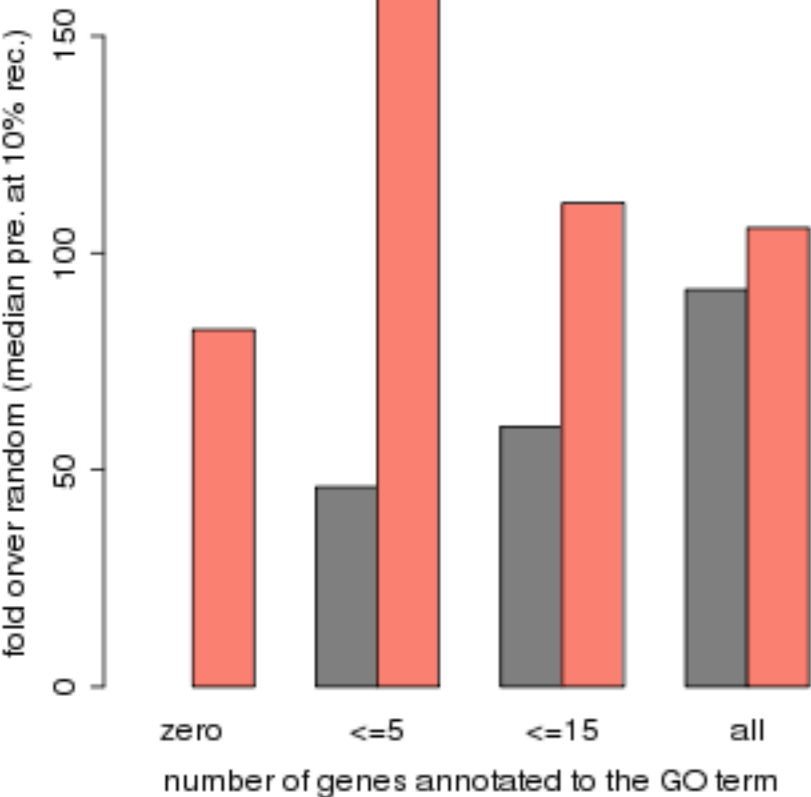

### C. elegans

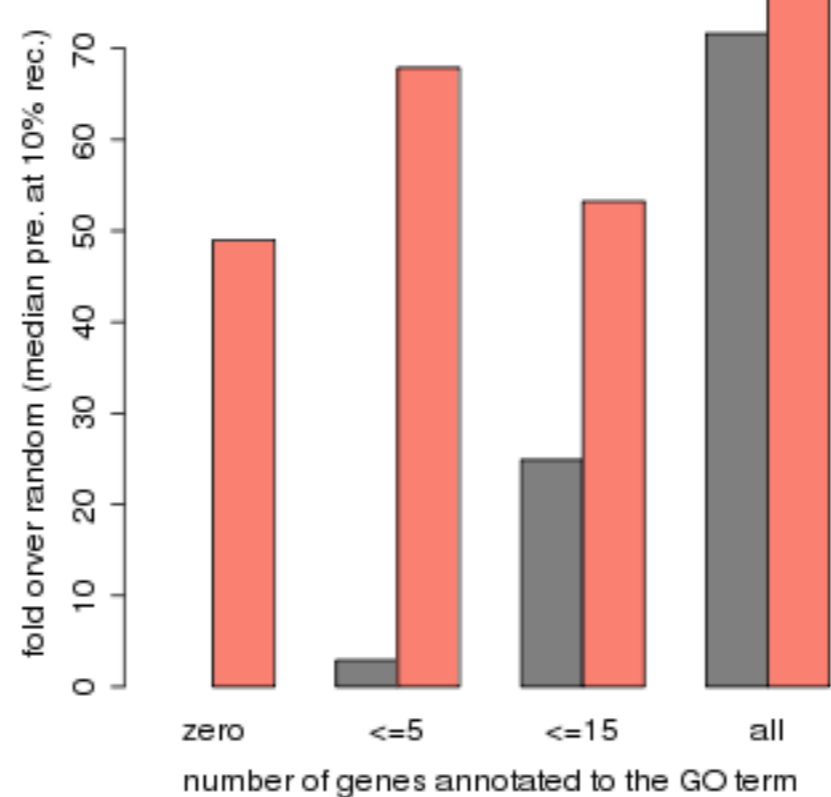

### D. melanogaster

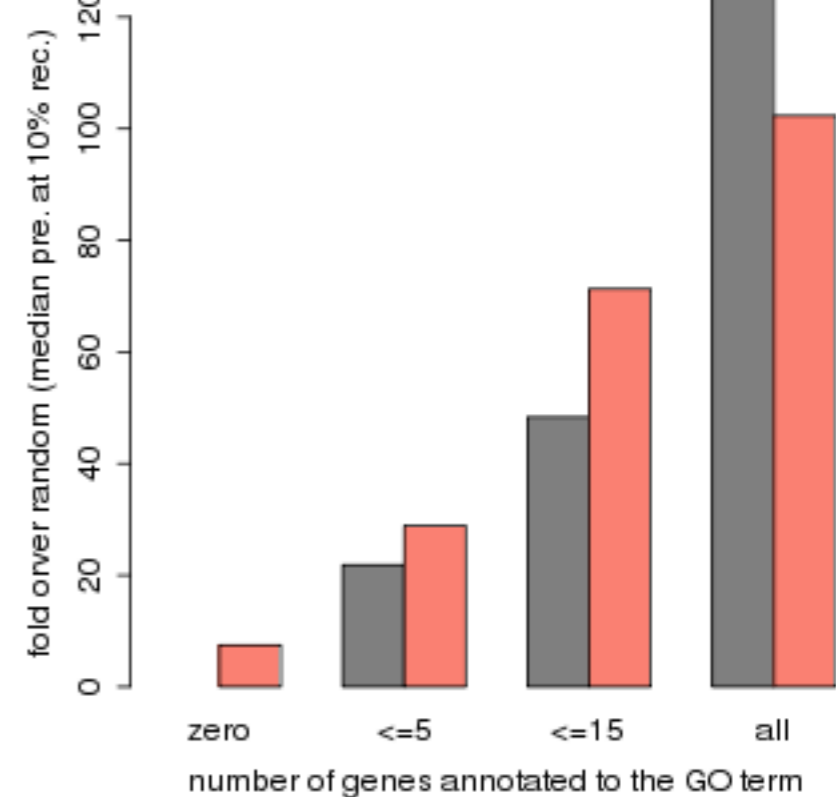

Supplement: pcbi.1002957.s001.pdf [file pcbi.1002957.s001.pdf]
