# Supplementary material for: Functional Knowledge Transfer for High-accuracy Prediction of Under-studied Biological Processes
Source: PubMed Central journal article supplement (PMC3597527; doi:10.1371/journal.pcbi.1002957), 2013-03-14

**A**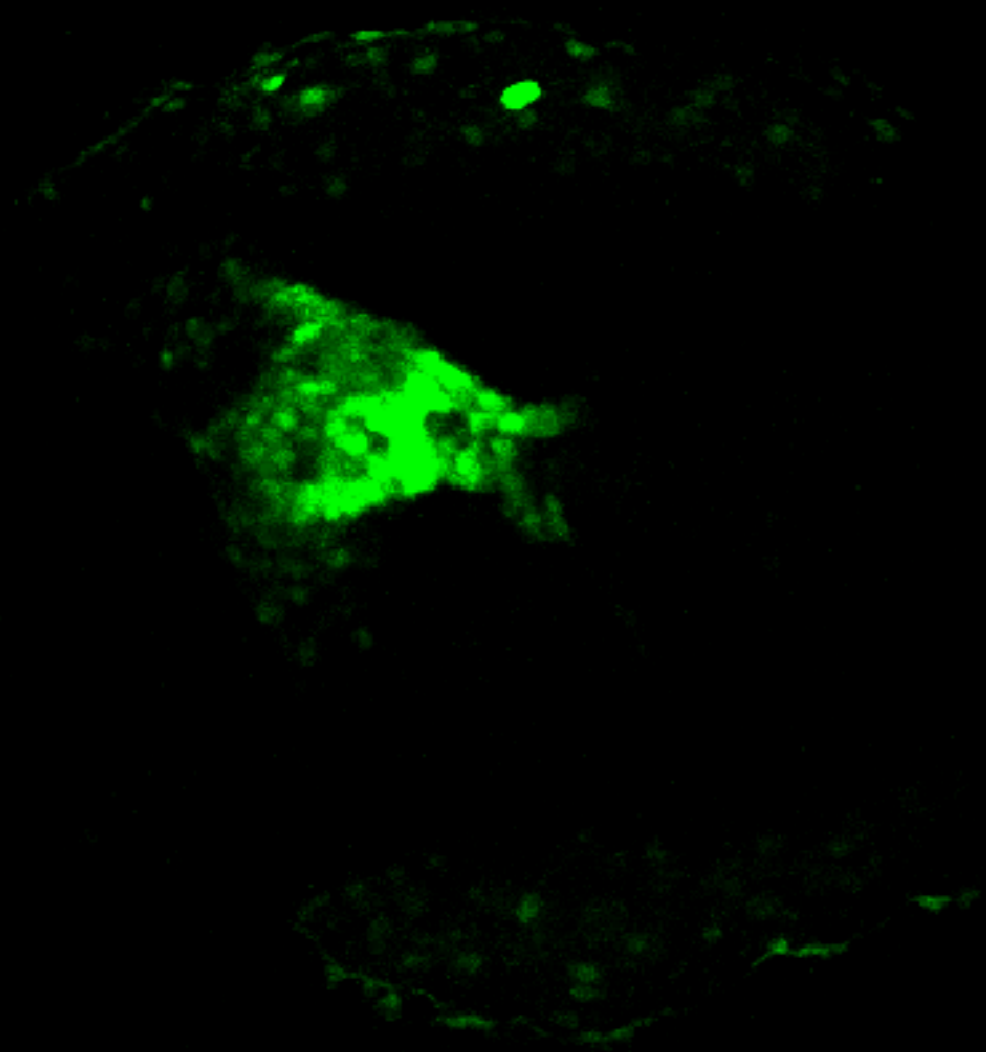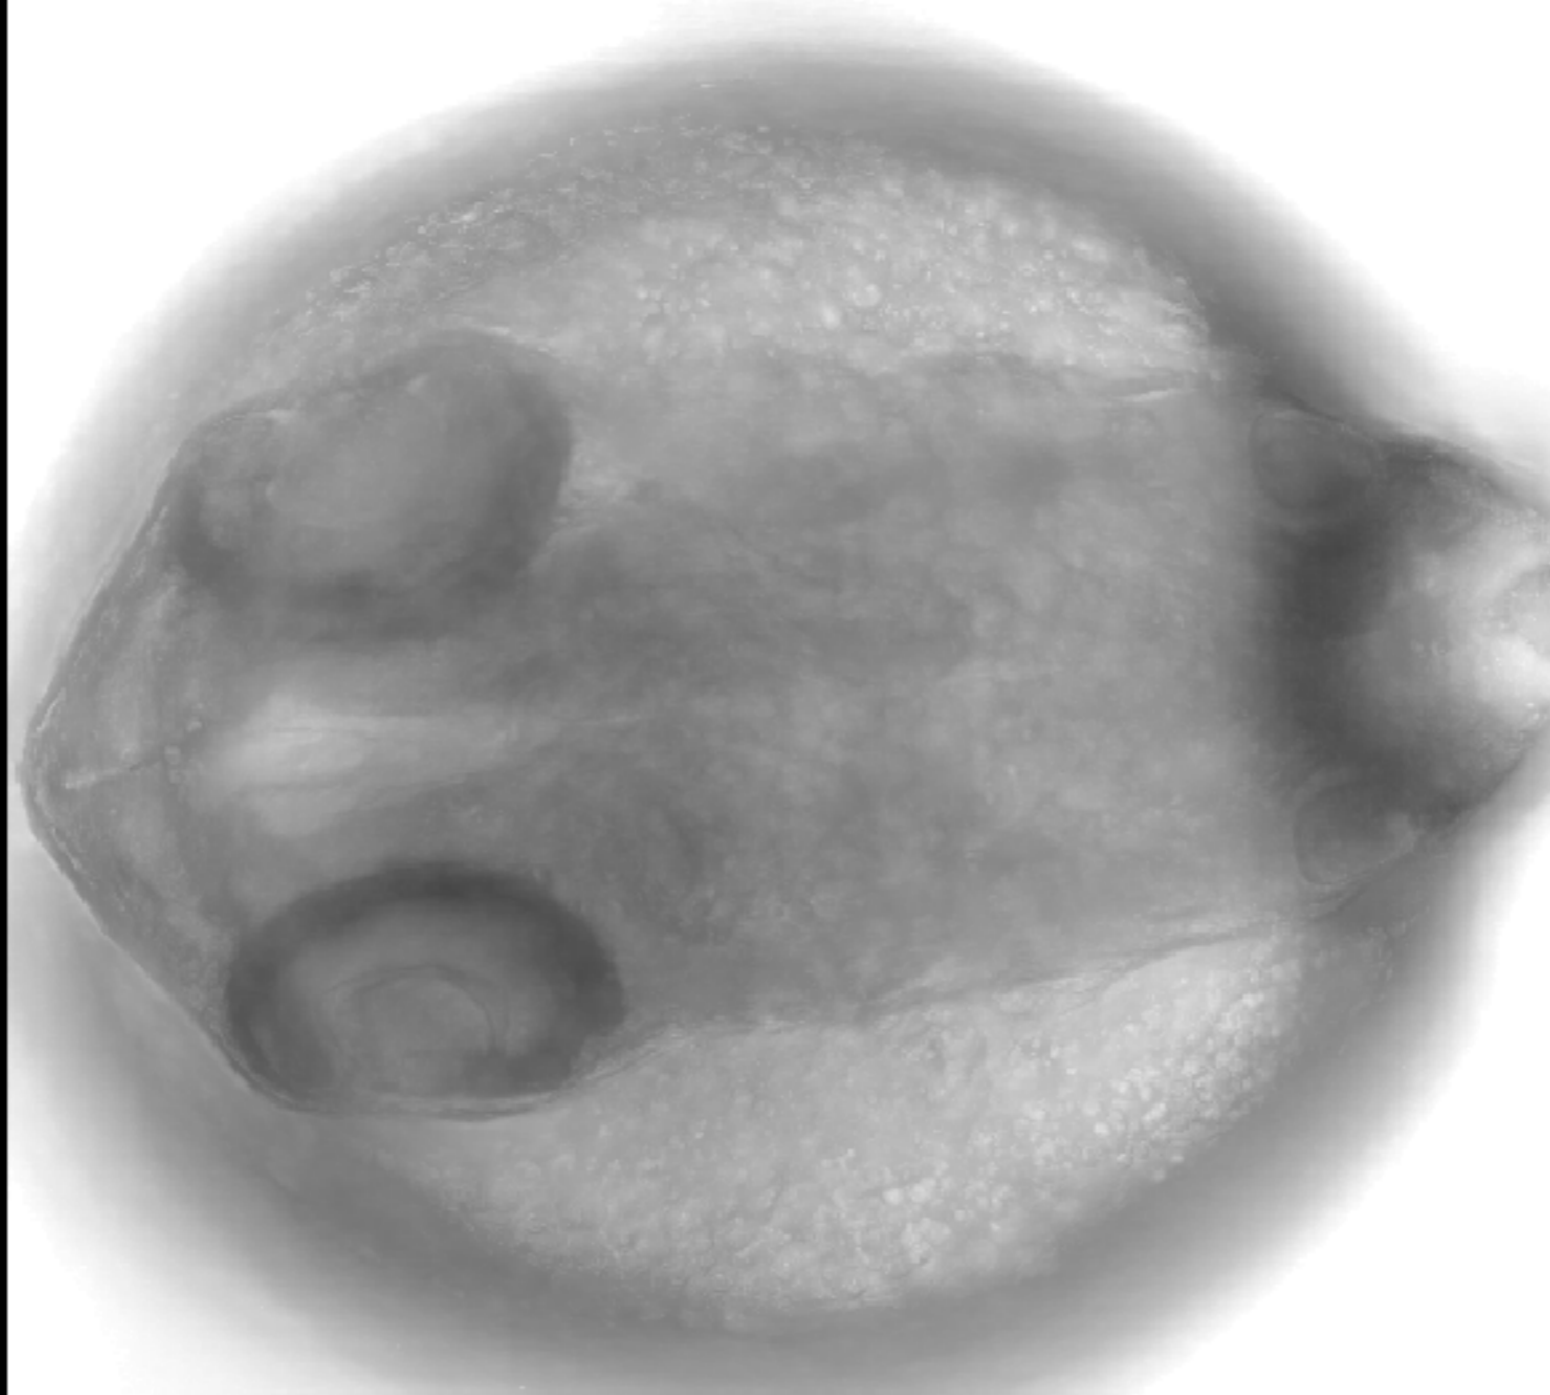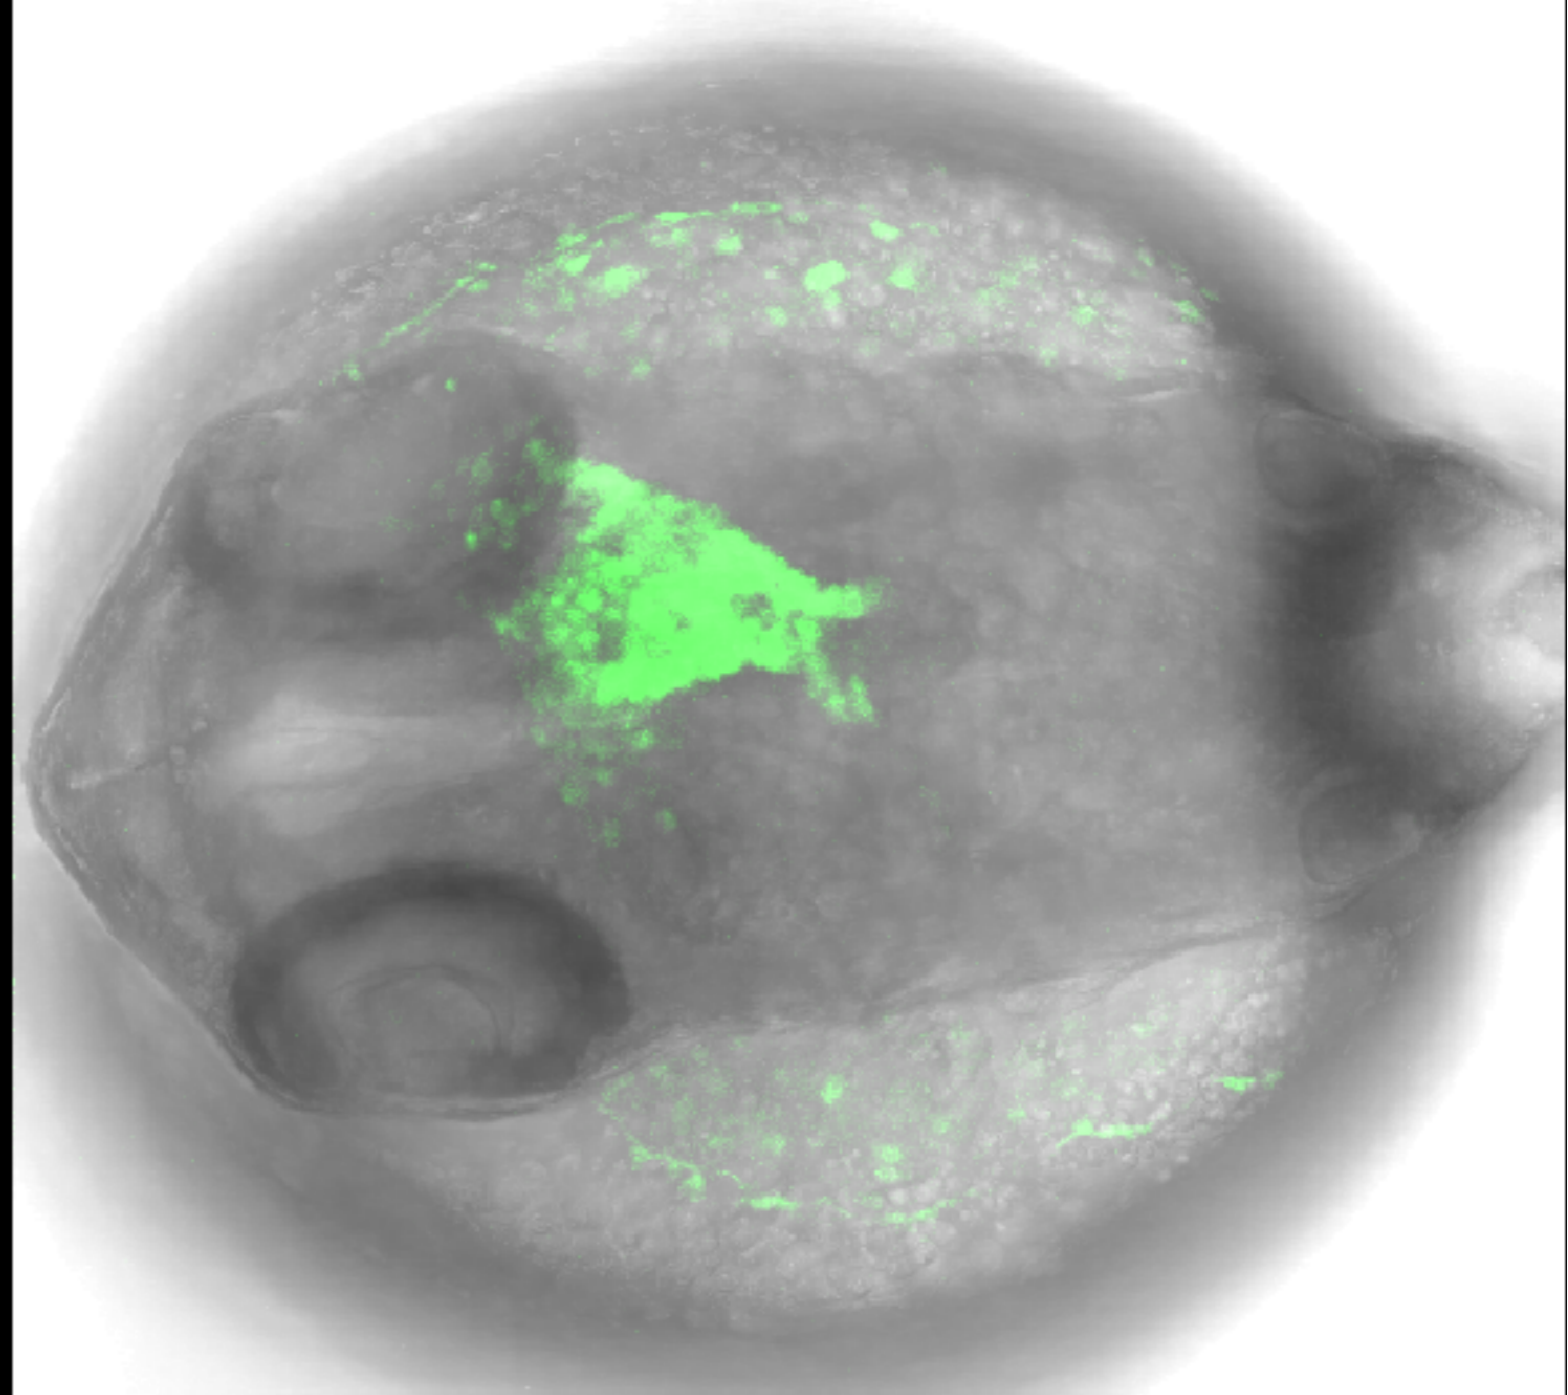**B**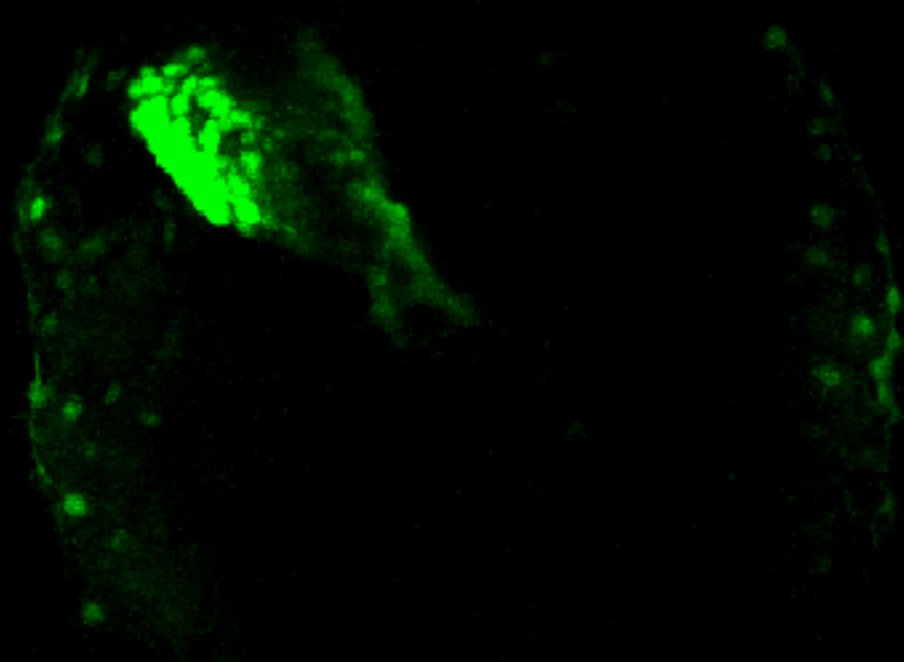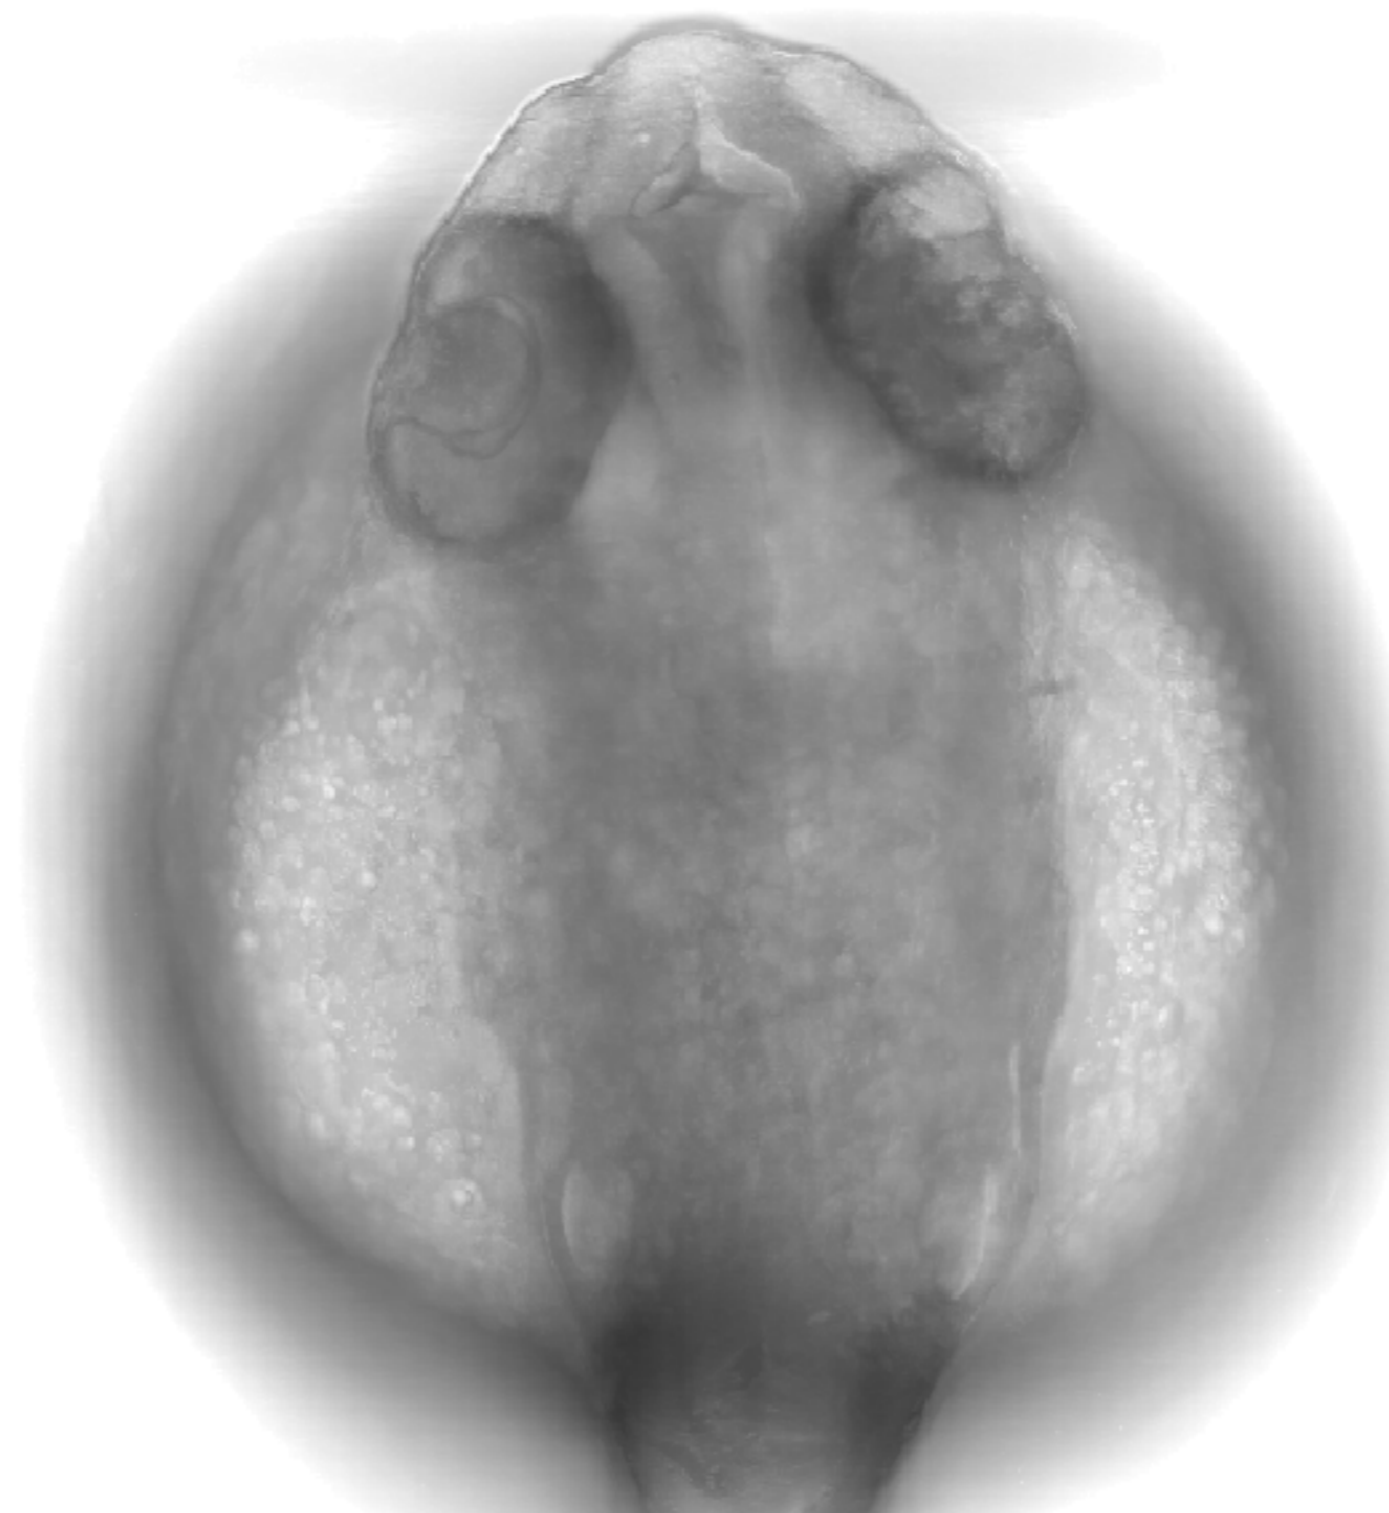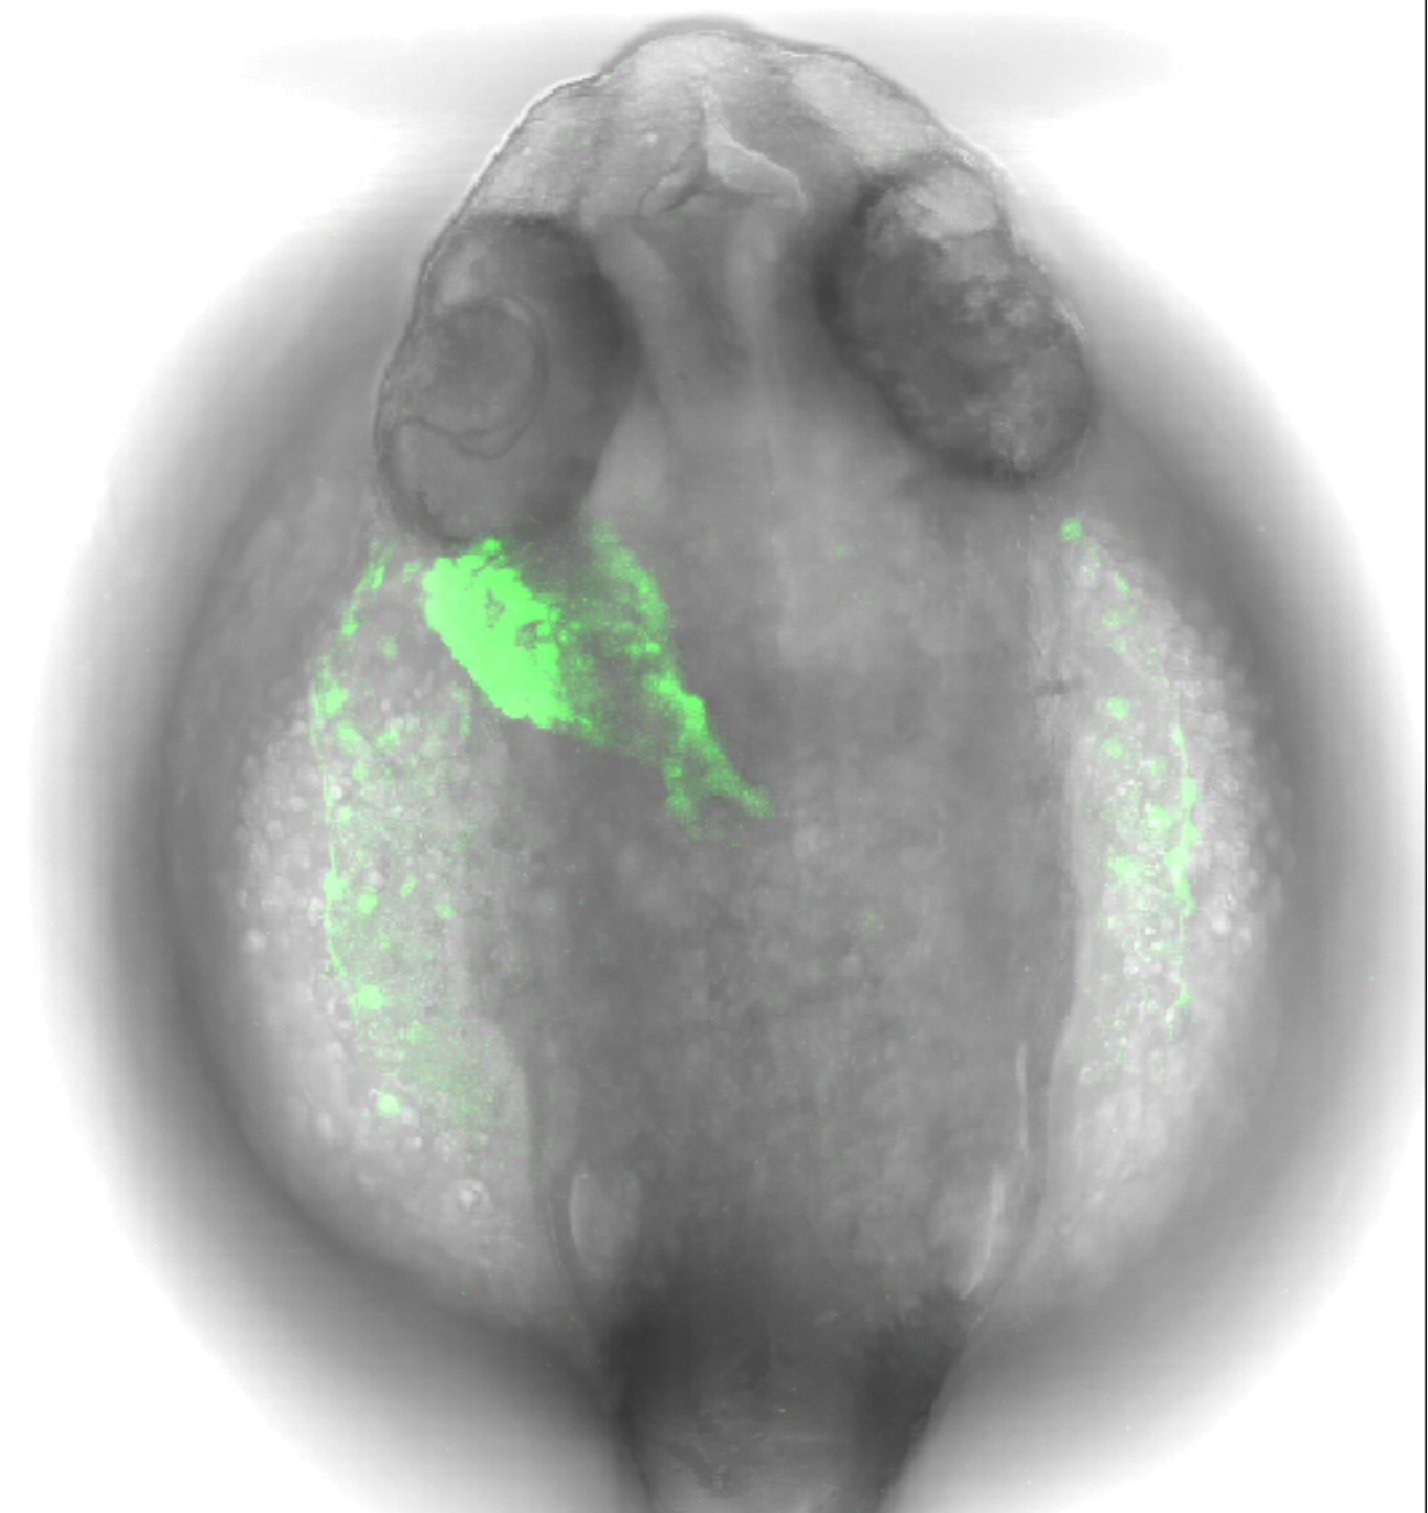**C**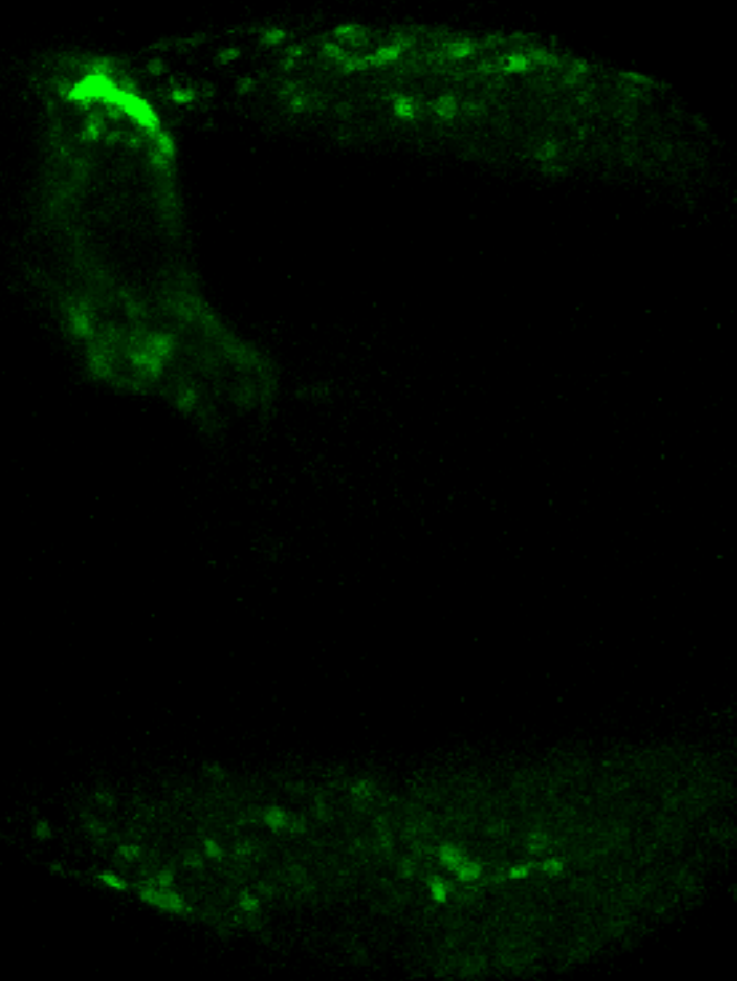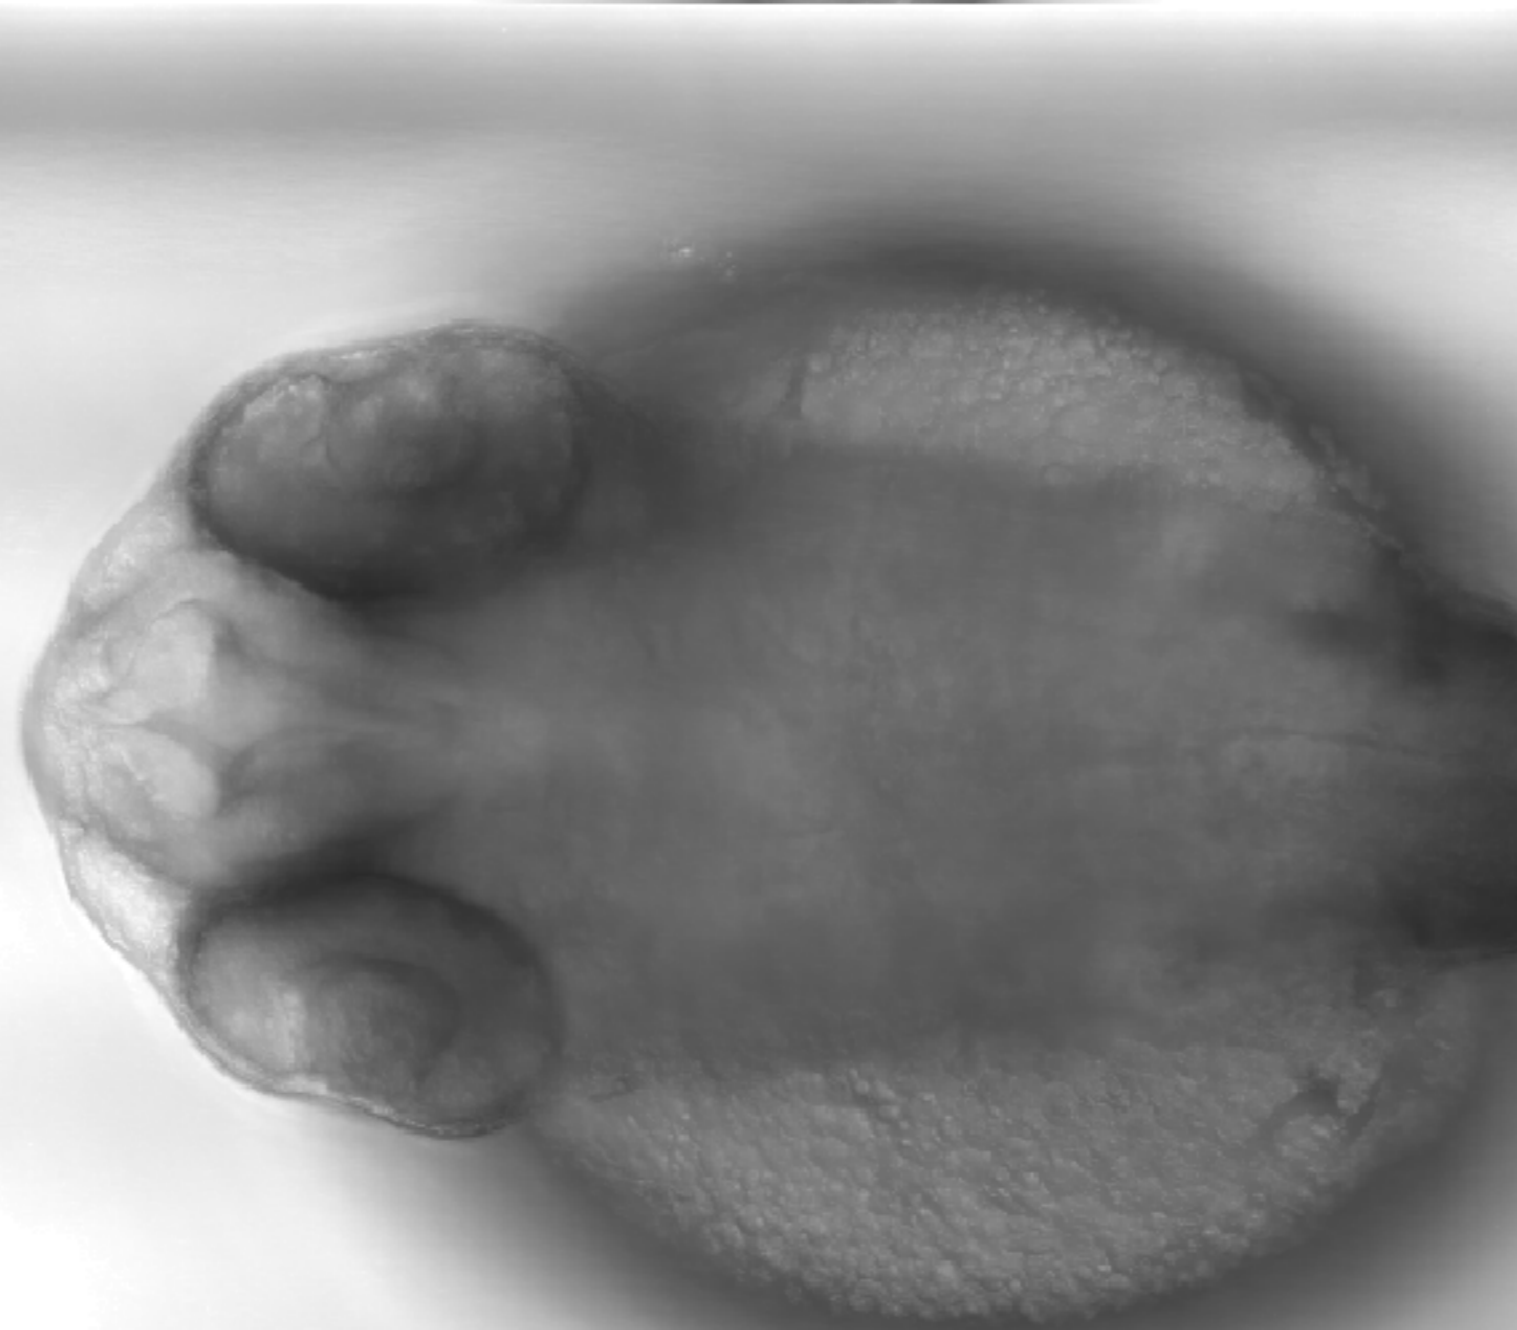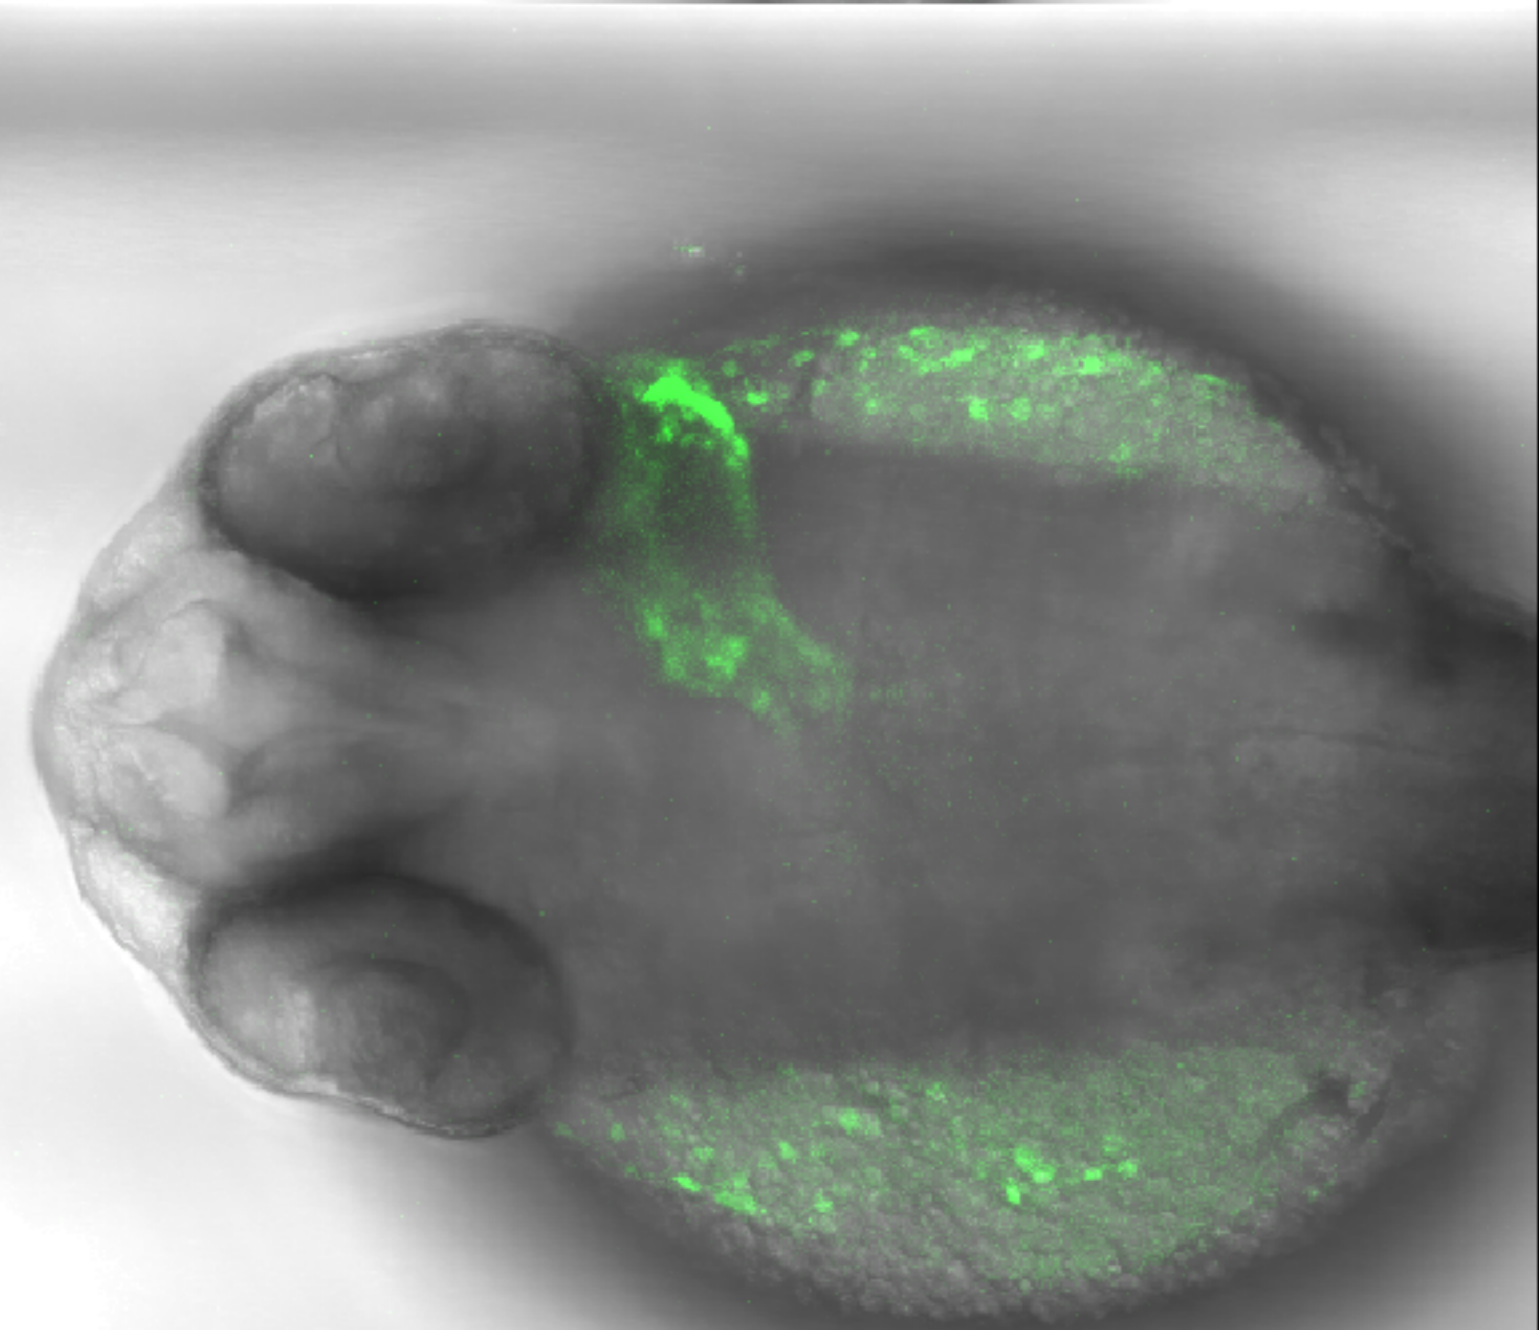

Supplement: pcbi.1002957.s004.pdf [file pcbi.1002957.s004.pdf]
